# Supplementary material for: Enhanced VWF clearance in low VWF pathogenesis: limitations of the VWFpp/VWF:Ag ratio and clinical significance
Source: PubMed Central journal article supplement — Blood Adv. 2022 May 10;7(3):302–8. doi: 10.1182/bloodadvances.2022007340 (PMC9898599; doi:10.1182/bloodadvances.2022007340), 2022-05-10
Supplement: BLOODA_ADV-2022-007340-mmc1.pdf [file BLOODA_ADV-2022-007340-mmc1.pdf]

## Supplemental Figure 1

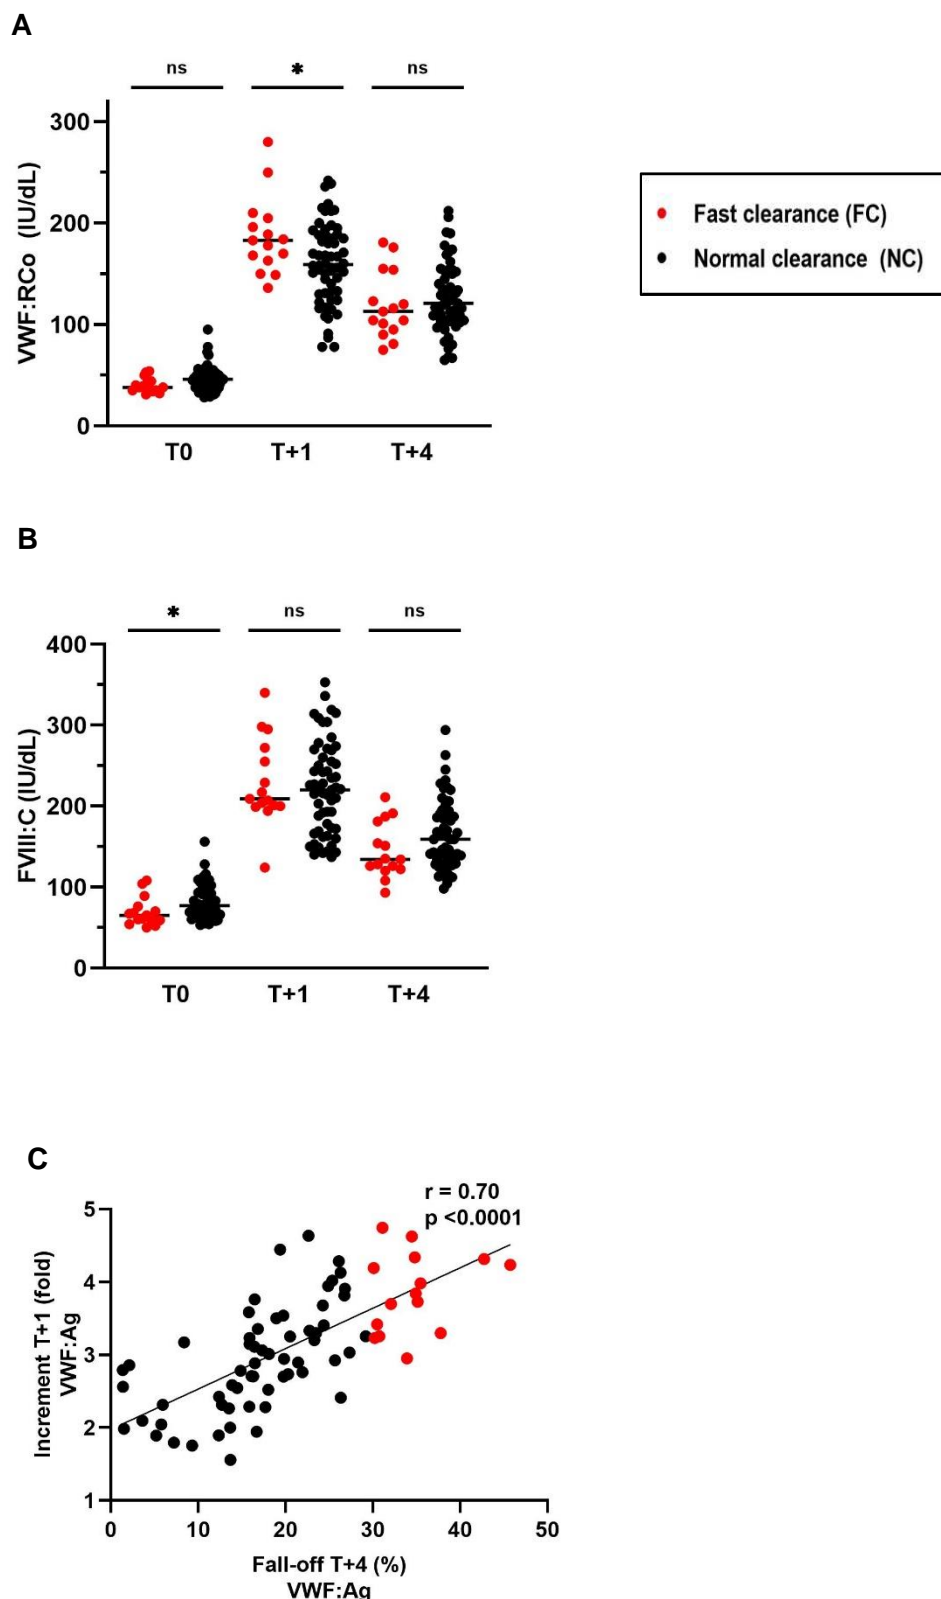

### SUPPLEMENTARY FIGURE 1.

Plasma VWF:RCo (A) and FVIII:C (B) levels at 1 hour and 4 hours following desmopressin in Low VWF patients with fast clearance (FC) compared to Low VWF patients with normal clearance (NC) rates. Similar to VWF:Ag, Low VWF patients in fast and normal clearance subgroups had similar T0 and T+4 VWF:RCo levels (IU/dL) (median 38 vs 46,  $p=0.10$ , median 113 vs 121,  $p=0.40$ , respectively). However, Low VWF patients with fast clearance had significantly higher T+1 VWF:RCo levels (median 183 vs 159,  $p=0.04$ ). Low VWF patients with fast clearance had lower T0 FVIII:C levels than those with normal clearance (median 65 vs 77,  $p=0.02$ ), with no difference between groups at T+1 and T+4 (median 209 vs 220,  $p=0.72$ , and 134 vs 159,  $p=0.07$ , respectively).

(C) Increment in plasma VWF:Ag levels (T+1/T+0) post-desmopressin were significantly correlated with fall-off in VWF:Ag at 4 hours (Pearson's  $r=0.70$ ,  $p<0.0001$ ).
